# Supplementary material
Source: PubMed Central journal article supplement (PMC4751804)
Supplement: JB.00693-15_zjb999093923so1.pdf [file JB.00693-15_zjb999093923so1.pdf]

## Supplementary figures

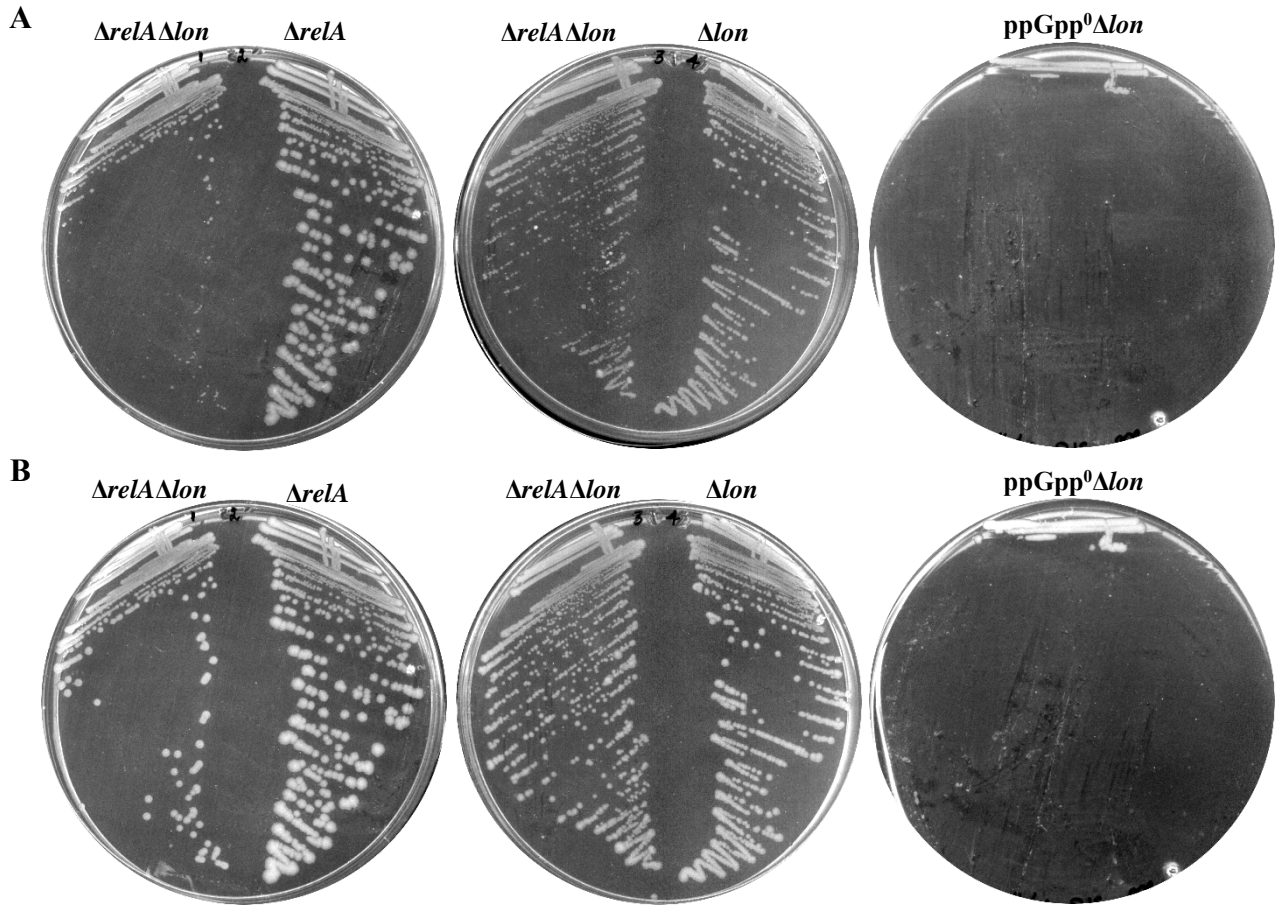

**Fig. S1. Growth defect of strains in LB medium.** Strains whose relevant genotypes are indicated were streaked and the plates photographed after 24 hours (A) or 40 hours (B) of incubation at 37°C. The  $ppGpp^0 \Delta lon$  / pRCspoT strain was maintained in the presence of Amp and IPTG.

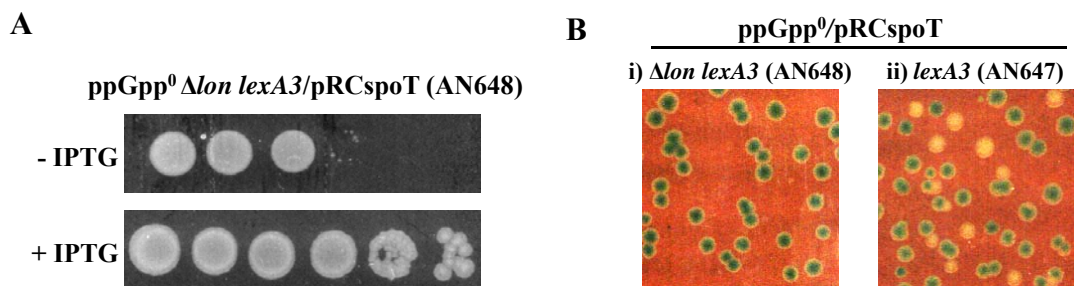

**Fig. S2. The synthetic growth defect of ppGpp<sup>0</sup>  $\Delta lon$  strain is not suppressed by *lexA3*.**

Strains whose relevant genotypes are indicated were studied for plating defect (A) or the instability of plasmid pRCspoT (B) Plating defect was monitored in LB medium in the absence or presence of 1mM IPTG. Plasmid loss was monitored in LB medium containing 1mM IPTG and X-Gal.

## Supplementary tables

**Table S1. Co-transduction frequency of  $\Delta lon::Kan$  and  $tsx::Tn10^a$  markers by phage P1 transduction.**

| Strain             | Relevant genotype                      | Number of Tet <sup>R</sup> transductants screened | Number of Tet <sup>R</sup> transductants that are Kan <sup>R</sup> | co-transduction (%) |
|--------------------|----------------------------------------|---------------------------------------------------|--------------------------------------------------------------------|---------------------|
| MG1655             | Wild-type                              | 263                                               | 38                                                                 | 14 <sup>b</sup>     |
| CF12510            | $\Delta relA$                          | 305                                               | 60                                                                 | 19                  |
| HR202              | $\Delta relA \Delta spoT$              | 270                                               | 0                                                                  | <0.4                |
| AN120 <sup>c</sup> | $\Delta relA \Delta spoT /$<br>pRCspoT | 270                                               | 33                                                                 | 12                  |

a-  $tsx::Tn10$  is linked 66% to  $lon^+$  as deduced by introducing  $tsx::Tn10$  by phage P1 transduction into MG1655  $\Delta lon::Kan$  (AN207); 51 Tet<sup>R</sup> Kan<sup>S</sup> transductants were scored after screening 77 Tet<sup>R</sup> transductants. P1 lysate prepared on an MG1655  $tsx::Tn10 \Delta lon::Kan$  strain was used for performing the co-transduction experiments.

b- The reason for decrease in co-transduction frequency from the expected 66% is not apparent.

c- Transductants were selected and screened in the presence of Amp and IPTG.

**Table S2. Quantification of pRCspoT plasmid instability.**

| <b>Strain</b>      | <b>Relevant genotype<sup>a</sup></b>                                          | <b>Frequency of plasmid loss<br/>(white colonies / total colonies)</b> |
|--------------------|-------------------------------------------------------------------------------|------------------------------------------------------------------------|
| AN131              | Wild-type                                                                     | <b>0.35 (54/156)</b>                                                   |
| AN207              | $\Delta lon::kan$                                                             | <b>0.46 (344/752)</b>                                                  |
| AN256              | $\Delta relA::FRT$                                                            | <b>0.26 (74/280)</b>                                                   |
| AN120              | $\Delta relA \Delta spoT$                                                     | <b>0.21 (46/216)</b>                                                   |
| AN844              | $\Delta relA::FRT \Delta lon::Kan$                                            | <b>0.34 (167/492)</b>                                                  |
| AN519              | $\Delta relA \Delta spoT \Delta lon::Kan$                                     | <b>&lt;0.001 (0/952)</b>                                               |
| AN567              | $\Delta relA \Delta spoT \Delta lon::Kan \Delta sulA::FRT$                    | <b>0.23 (218/966)</b>                                                  |
| AN568              | $\Delta relA \Delta spoT \Delta lon::Kan \Delta rcsB::FRT$                    | <b>&lt;0.001 (0/873)</b>                                               |
| AN512              | $\Delta relA \Delta spoT \Delta lon::Kan$ / pBAD24                            | <b>&lt;0.006 (0/175)</b>                                               |
| AN513              | $\Delta relA \Delta spoT \Delta lon::Kan$ / plon <sup>+</sup> (– arabinose)   | <b>&lt;0.003 (0/357)</b>                                               |
| AN513              | $\Delta relA \Delta spoT \Delta lon::Kan$ / plon <sup>+</sup> (+ arabinose)   | <b>0.15 (139/916)</b>                                                  |
| AN514 <sup>b</sup> | $\Delta relA \Delta spoT \Delta lon::Kan$ / plon S679A<br>(+ arabinose)       | <b>&lt;0.004 (0/238)</b>                                               |
| AN515 <sup>b</sup> | $\Delta relA \Delta spoT \Delta lon::Kan$ / plon K362Q<br>(+ arabinose)       | <b>&lt;0.005 (0/201)</b>                                               |
| AN516 <sup>b</sup> | $\Delta relA \Delta spoT \Delta lon::Kan$ / plon S679A K362Q<br>(+ arabinose) | <b>&lt;0.009 (0/106)</b>                                               |

|       |                                                                                                   |                          |
|-------|---------------------------------------------------------------------------------------------------|--------------------------|
| AN825 | $\Delta dksA::FRT \Delta lon::Kan$                                                                | <b>0.43 (176/410)</b>    |
| AN688 | $\Delta relA \Delta spoT \Delta lon::Kan / pdksA'$                                                | <b>&lt;0.005 (0/221)</b> |
| AN689 | $\Delta relA \Delta spoT \Delta lon::Kan / pdksA$                                                 | <b>0.24 (72/304)</b>     |
| AN690 | $\Delta relA \Delta spoT \Delta lon::Kan / pdksA^{NN}$                                            | <b>0.2 (68/332)</b>      |
| AN677 | $\Delta relA \Delta spoT \Delta lon::Kan / pCL1920$                                               | <b>&lt;0.001 (0/855)</b> |
| AN678 | $\Delta relA \Delta spoT \Delta lon::Kan / pCLftsQAZ$                                             | <b>0.43 (148/348)</b>    |
| AN679 | $\Delta relA \Delta spoT \Delta lon::Kan / pCLsdiA$                                               | <b>0.41 (112/272)</b>    |
| AN680 | $\Delta relA \Delta spoT \Delta lon::Kan / pSCftsQAZ$                                             | <b>0.39 (192/488)</b>    |
| AN792 | $\Delta relA \Delta spoT \Delta lon::Kan / pCA24N$                                                | <b>&lt;0.01 (0/95)</b>   |
| AN793 | $\Delta relA \Delta spoT \Delta lon::Kan / pCA24NftsZ$                                            | <b>0.15 (8/52)</b>       |
| AN840 | $\Delta relA \Delta spoT \Delta lon::FRT att\lambda::(P_{208}\text{-ftsZ-gfp})$<br>(+ 0.1mM IPTG) | <b>0.19 (68/364)</b>     |
| AN647 | $\Delta relA \Delta spoT \Delta lon::FRT \Delta recA::Kan$                                        | <b>0.22 (67/311)</b>     |
| AN648 | $\Delta relA \Delta spoT \Delta lon::Kan \Delta recA::Kan$                                        | <b>&lt;0.002 (0/646)</b> |
| AN750 | $\Delta relA \Delta spoT \Delta lon::FRT \Delta recA::Kan$                                        | <b>&lt;0.002 (0/453)</b> |

a - All strains studied carry the  $\Delta lacZYAI::FRT$  allele on the chromosome and either plasmid pRCspoT (Amp<sup>R</sup>) or pRC<sub>Sp</sub>-spoT (Sp<sup>R</sup>) except AN825 which carries pRCdksA (Amp<sup>R</sup>). Segregation of blue and white colonies was followed in LB agar plates with IPTG and X-gal. Whenever a second plasmid was present in the strain appropriate antibiotic was added to select for the plasmid and whenever required inducer was added as indicated to activate expression of the plasmid borne gene.

b –frequency of plasmid loss was similar in the presence or absence of arabinose.

**Table S3. Strains and plasmids.**

| <b>Strain or plasmid</b> | <b>Relevant genotype or features</b>                                                                      | <b>Source or reference</b> |
|--------------------------|-----------------------------------------------------------------------------------------------------------|----------------------------|
| MG1655                   | F <sup>-</sup> λ <sup>-</sup> <i>ilvG<sup>-</sup> rfb-50 rph-1</i> , sequenced wild-type K12              | Lab collection             |
| AG1                      | <i>recA1 endA1 gyrA96 thi-1 hsdR17 (r<sub>K</sub><sup>-</sup> m<sub>K</sub><sup>+</sup>) supE44 relA1</i> | (1)                        |
| JW0093                   | AG1 / pCA24NftsZ                                                                                          | (1)                        |
| AN56                     | MG1655 Δ <i>relA</i> ::FRT                                                                                | This study                 |
| HR202                    | MG1655 Δ <i>relA</i> Δ <i>spoT</i>                                                                        | This study                 |
| AN131                    | MG1655 Δ <i>lac</i> ::FRT / pRC <i>spoT</i>                                                               | This study                 |
| AN256                    | AN131 Δ <i>relA</i> ::FRT                                                                                 | This study                 |
| AN120                    | HR202 Δ <i>lac</i> ::FRT / pRC <i>spoT</i>                                                                | This study                 |
| AN207                    | AN131 Δ <i>lon</i> ::Kan                                                                                  | This study                 |
| AN844                    | AN256 Δ <i>lon</i> ::Kan                                                                                  | This study                 |
| AN519                    | AN120 Δ <i>lon</i> ::Kan                                                                                  | This study                 |
| AN518                    | HR202 Δ <i>lac</i> ::FRT Δ <i>lon</i> ::Kan / pRC <sub>Sp</sub> - <i>spoT</i>                             | This study                 |
| AN512                    | AN518 / pBAD24                                                                                            | This study                 |
| AN513                    | AN518 / plon <sup>+</sup>                                                                                 | This study                 |
| AN514                    | AN518 / plonS679A                                                                                         | This study                 |

|       |                                                                                                 |            |
|-------|-------------------------------------------------------------------------------------------------|------------|
| AN515 | AN518 / plonK362Q                                                                               | This study |
| AN516 | AN518 / plonS679A K362Q                                                                         | This study |
| AN565 | AN120 $\Delta$ <i>sulA</i> :: FRT                                                               | This study |
| AN567 | AN565 $\Delta$ <i>lon</i> ::Kan                                                                 | This study |
| AN568 | AN519 $\Delta$ <i>rcsB</i> ::FRT                                                                | This study |
| AN647 | AN120 <i>lexA3</i> (Ind <sup>-</sup> ) <i>malB</i> ::Tn9                                        | This study |
| AN648 | AN647 $\Delta$ <i>lon</i> ::Kan                                                                 | This study |
| AN750 | AN120 $\Delta$ <i>lon</i> ::FRT $\Delta$ <i>recA</i> ::Kan                                      | This study |
| AN658 | MG1655 $\Delta$ <i>lac</i> ::FRT <i>sulA-lacZ</i>                                               | This study |
| AN837 | AN658 <i>srl300</i> ::Tn10                                                                      | This study |
| AN838 | AN837 <i>recA56 srl300</i> ::Tn10                                                               | This study |
| AN839 | AN658 <i>lexA3</i> (Ind <sup>-</sup> ) <i>malB</i> ::Tn9                                        | This study |
| AN660 | HR202 $\Delta$ <i>lac</i> ::FRT <i>sulA-lacZ</i>                                                | This study |
| AN774 | AN658 $\Delta$ <i>lon</i> ::FRT                                                                 | This study |
| AN743 | AN660 $\Delta$ <i>lon</i> ::FRT                                                                 | This study |
| AN803 | MG1655 $\Delta$ <i>lac</i> ::FRT $\Delta$ <i>sulA</i> ::Kan                                     | This study |
| AN825 | MG1655 $\Delta$ <i>lac</i> ::FRT $\Delta$ <i>dksA</i> ::FRT $\Delta$ <i>lon</i> ::Kan / pRCdksA | This study |
| AN688 | AN518 / <i>pdksA'</i>                                                                           | This study |
| AN689 | AN518 / <i>pdksA</i>                                                                            | This study |

|          |                                                                           |            |
|----------|---------------------------------------------------------------------------|------------|
| AN690    | AN518 / <i>pdksA</i> <sup>NN</sup>                                        | This study |
| AN352    | AN519 <i>rpoB</i> *35 <i>btuB</i> ::Tn10                                  | This study |
| AN353    | AN519 <i>rpoB</i> L571P <i>btuB</i> ::Tn10                                | This study |
| AN826    | AN519 <i>btuB</i> ::Tn10                                                  | This study |
| AN677    | AN519 / pCL1920                                                           | This study |
| AN678    | AN519 / pCLftsQAZ                                                         | This study |
| AN679    | AN519 / pCLsdiA                                                           | This study |
| AN680    | AN519 / pSCftsQAZ                                                         | This study |
| AN792    | AN519 / pCA24N                                                            | This study |
| AN793    | AN519 / pCA24NftsZ                                                        | This study |
| AN840    | AN518 attλ::( <i>P</i> <sub>208-ftsZ</sub> - <i>gfp</i> , Amp)            | This study |
| AN819    | HR202 Δ <i>lac</i> ::FRT / <i>plon</i> <sup>+</sup>                       | This study |
| Plasmids |                                                                           |            |
| pCL1920  | pSC101-based; Sp <sup>R</sup>                                             | (2)        |
| pBAD24   | ColE1-derived; Amp <sup>R</sup>                                           | (3)        |
| pCP20    | pSC101 temperature-sensitive replicon, Amp <sup>R</sup> , Cm <sup>R</sup> | (4)        |
| pRC7     | Mini-F based; Amp <sup>R</sup>                                            | (5)        |
| pRCspoT  | pRC7 with <i>spoT</i>                                                     | This study |
| pRCdksA  | pRC7 with <i>dksA</i>                                                     | This study |



|                         |                                                                                                                                                      |             |
|-------------------------|------------------------------------------------------------------------------------------------------------------------------------------------------|-------------|
| pRC <sub>Sp</sub> -spoT | <i>bla</i> of pRCspoT replaced with <i>aadA</i> gene; Sp <sup>R</sup>                                                                                | This study  |
| plon <sup>+</sup>       | pBAD24 with <i>lon</i> <sup>+</sup>                                                                                                                  | (6)         |
| plonS679A               | pBADlonS679A                                                                                                                                         | (6)         |
| plonK362Q               | pBADlonK362Q                                                                                                                                         | (6)         |
| plonS679A<br>K362Q      | pBADlonS679A K362Q                                                                                                                                   | (6)         |
| pMN8                    | pCL1920- <i>ftsQAZ</i> (pCLftsQAZ)                                                                                                                   | (7)         |
| pMN15                   | pCL1920- <i>sdiA</i> (pCLsdiA)                                                                                                                       | (7)         |
| pTB63                   | pSC101-based carrying <i>ftsQAZ</i> (pSCftsQAZ); Tet <sup>R</sup>                                                                                    | (8)         |
| pCA24N                  | Cloning vector used in ASKA Library; Cm <sup>R</sup>                                                                                                 | (1)         |
| pCA24NftsZ              | pCA24N carrying His <sub>6</sub> - <i>ftsZ</i>                                                                                                       | (1)         |
| pJK537                  | pBR322- <i>dksA</i> (pdksA); Amp <sup>R</sup>                                                                                                        | (9)         |
| pHM1684                 | pBR322- <i>dkaA</i> <sup>NN</sup> (pdksA <sup>NN</sup> ), aspartic acid residues at 71 and 74 positions replaced with asparagine; Amp <sup>R</sup> . | Mike Cashel |
| pHR53                   | pBR322- <i>dksA'</i> (pdksA'), <i>dksA</i> deleted after 36 <sup>th</sup> amino acid; Amp <sup>R</sup>                                               | This study  |

**Table S4. Primers used in the study.**

| <b>Primer</b>   | <b>Sequence</b>                                                   |
|-----------------|-------------------------------------------------------------------|
| JGOpRC7spoTFP   | ATGAATTCGTTAATCACAAAGCGGGTCG                                      |
| JGOpRC7spoTRP   | ATAAGCTTAATTTTCGGTTTCGGGTGACT                                     |
| JGOpRC7dksAFP   | ATGAATTCGATAGTGCGTGTTAAGGAG                                       |
| JGOpRC7dksARP   | ATAAGCTTAGCCAGCCATCTGTTTTTCG                                      |
| JGospecpRChomFP | ACCCTGATAAATGCTTCAATAATATTGAAAAAGGAAGAGT<br>ATGCGCTCACGTA ACTGGTC |
| JGospecpRChomRP | AATCAATCTAAAGTATATATGAGTAAACTTGGTCTGACAG<br>TTATTTGCCGACTACCTTGG  |
| JGOdellacZYAIFP | CACCATCGAATGGCGCAAACCTTTCGCGGTATGGCATGA<br>ATTCCGGGGATCCGTCGACC   |
| JGOdellacZYAIRP | CGTATCAGGCAATTTTTATAATTTAAACTGACGATTCAACG<br>TGTAGGCTGGAGCTGCTTCG |

## References

1. **Kitagawa M, Ara T, Arifuzzaman M, Ioka-Nakamichi T, Inamoto E, Toyonaga H, Mori H.** 2005. Complete set of ORF clones of Escherichia coli ASKA library (a complete set of E. coli K-12 ORF archive): unique resources for biological research. *DNA Res* **12**:291-299.
2. **Lerner CG, Inouye M.** 1990. Low copy number plasmids for regulated low-level expression of cloned genes in Escherichia coli with blue/white insert screening capability. *Nucleic Acids Res* **18**:4631.
3. **Guzman LM, Belin D, Carson MJ, Beckwith J.** 1995. Tight regulation, modulation, and high-level expression by vectors containing the arabinose PBAD promoter. *J Bacteriol* **177**:4121-4130.
4. **Cherepanov PP, Wackernagel W.** 1995. Gene disruption in Escherichia coli: TcR and KmR cassettes with the option of Flp-catalyzed excision of the antibiotic-resistance determinant. *Gene* **158**:9-14.
5. **Bernhardt TG, de Boer PA.** 2004. Screening for synthetic lethal mutants in Escherichia coli and identification of EnvC (YibP) as a periplasmic septal ring factor with murein hydrolase activity. *Mol Microbiol* **52**:1255-1269.
6. **Van Melderen L, Gottesman S.** 1999. Substrate sequestration by a proteolytically inactive Lon mutant. *Proc Natl Acad Sci U S A* **96**:6064-6071.
7. **Reddy M.** 2007. Role of FtsEX in cell division of Escherichia coli: viability of ftsEX mutants is dependent on functional SufI or high osmotic strength. *J Bacteriol* **189**:98-108.

8. **Bernhardt TG, de Boer PA.** 2005. SlmA, a nucleoid-associated, FtsZ binding protein required for blocking septal ring assembly over Chromosomes in *E. coli*. *Mol Cell* **18**:555-564.
9. **Kang PJ, Craig EA.** 1990. Identification and characterization of a new *Escherichia coli* gene that is a dosage-dependent suppressor of a *dnaK* deletion mutation. *J Bacteriol* **172**:2055-2064.
